# Supplementary material for: Transcriptomics Integrated with Metabolomics Reveals the Effect of Cluster Thinning on Monoterpene Biosynthesis in ‘Muscat Hamburg’ Grape
Source: MDPI journal article supplement (doi:10.3390/foods10112718), 2021-11-06
Supplement: s1 [file s1]

**Supplementary Figure S1.** Technological parameters of grape berries from different loading grapes during the ripening stages. Data are presented as mean  $\pm$  standard error (n=3). Different letters indicate significant differences (Duncan's multiple range test,  $p \leq 0.05$ ).

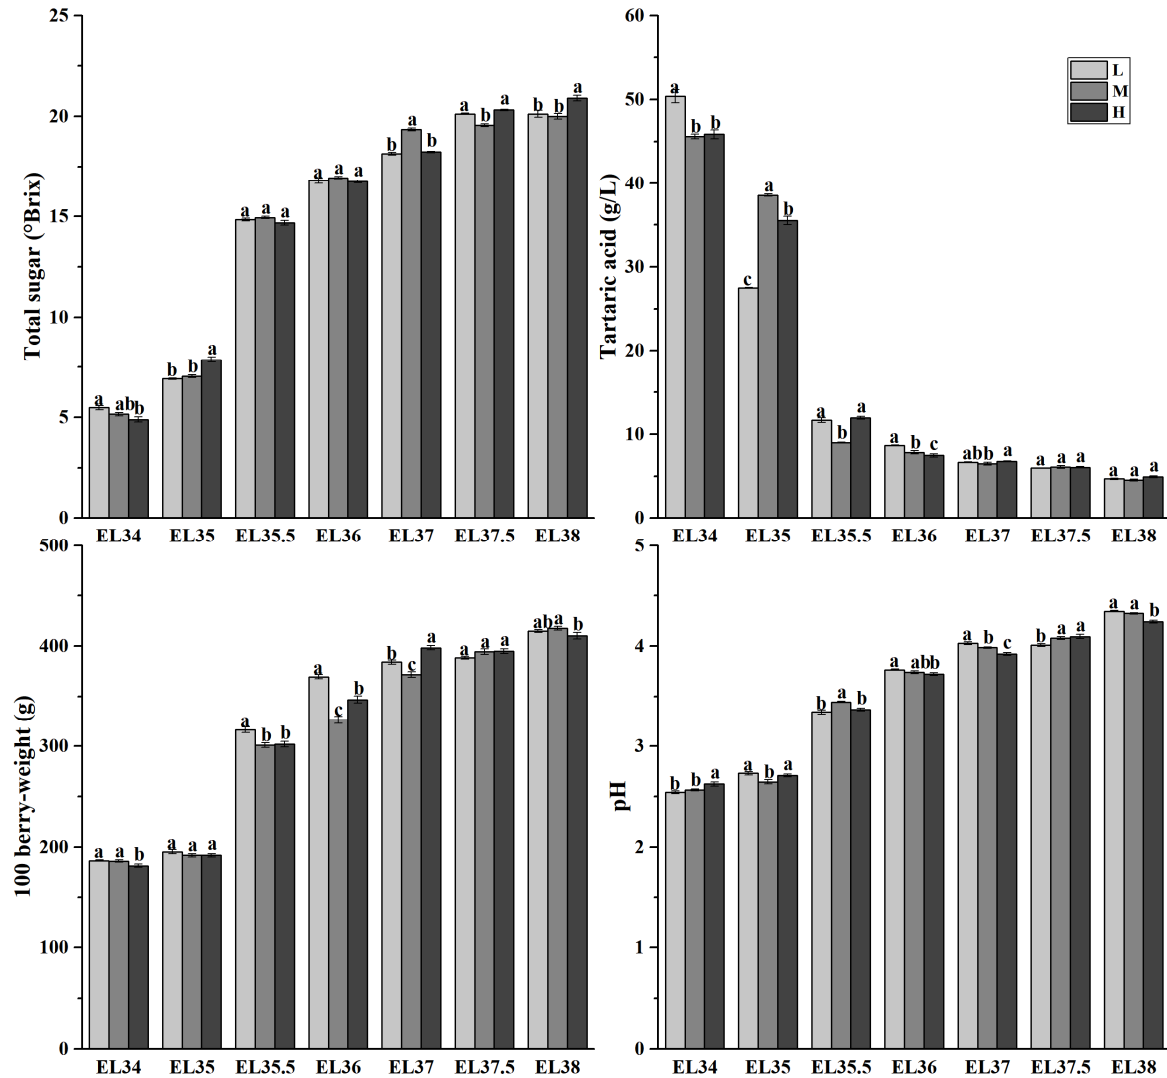

**Supplementary Figure S2.** Changes of total monoterpenes (total free and total bound) profiles in Muscat Hamburg grape at six developmental stages.

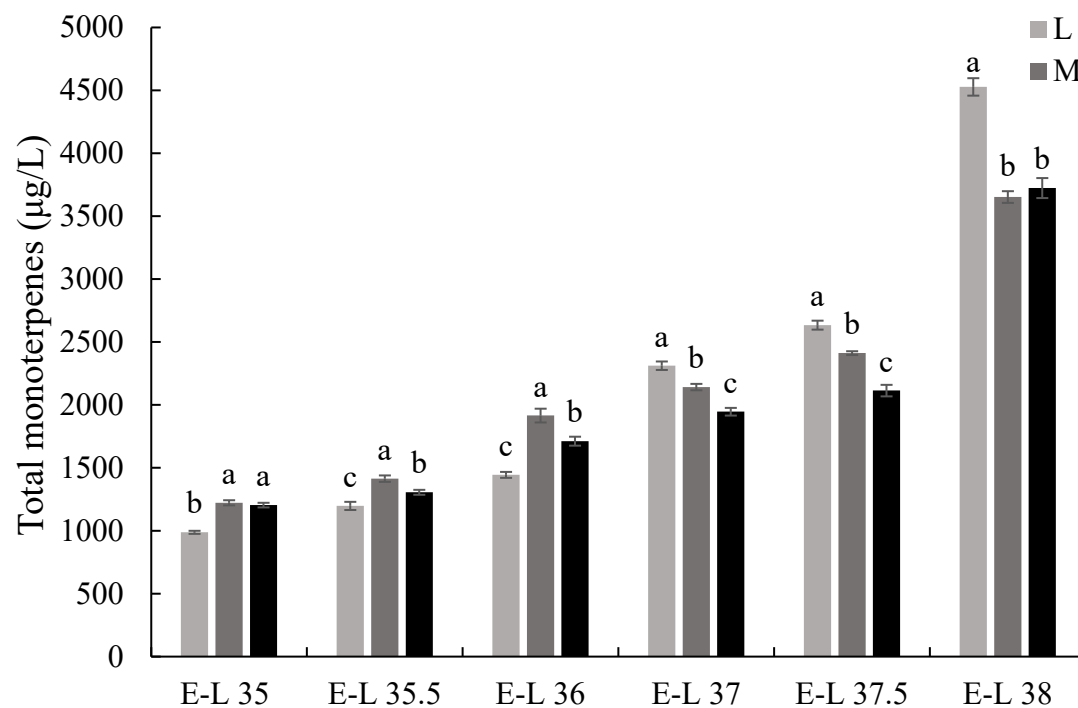

**Supplementary Figure S3.** eggNOG function classification on brown module genes.

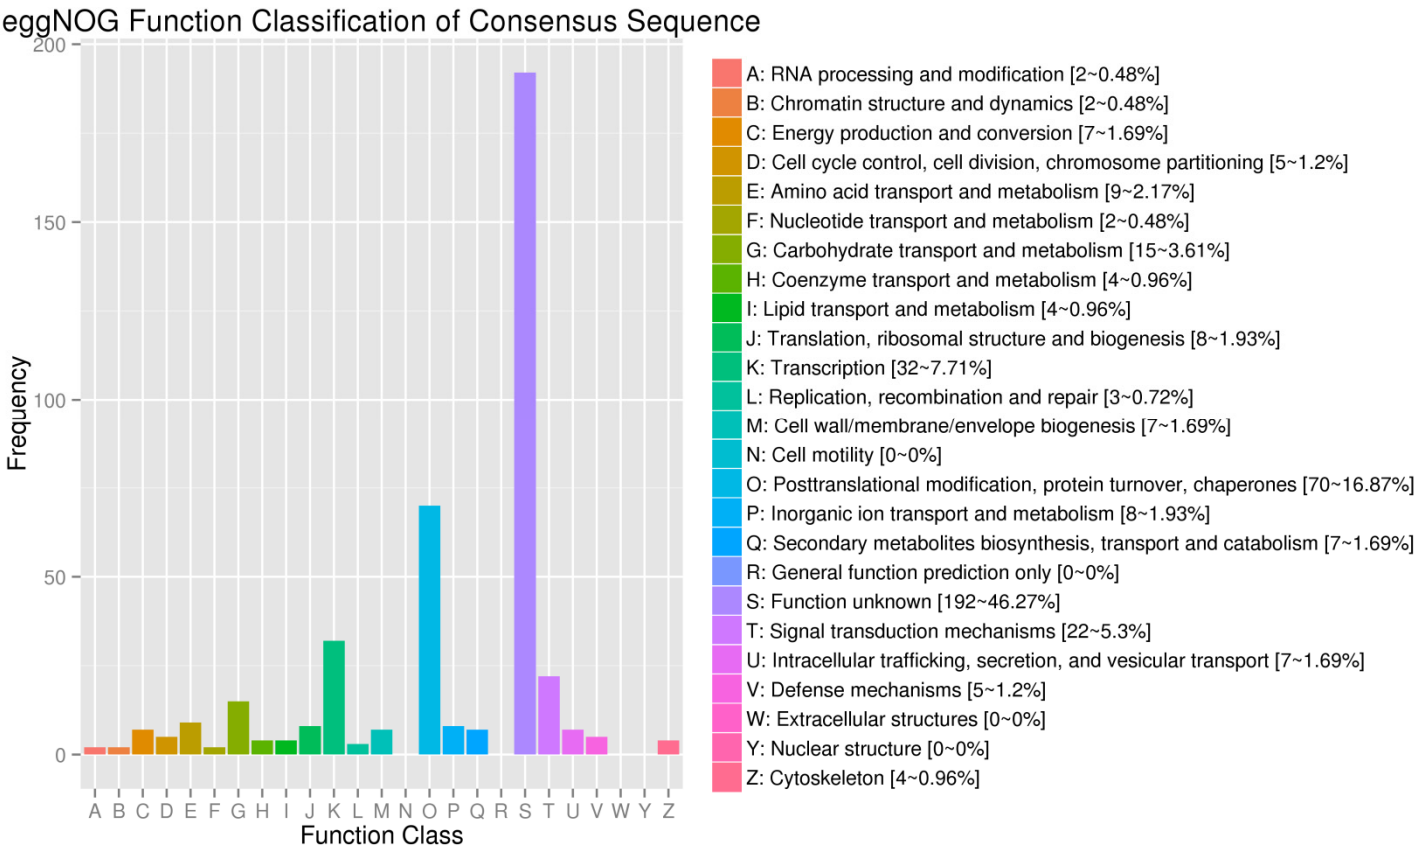

**Supplementary Figure S4.** KEGG analysis on brown module genes. Column length indicates the number of genes under this category.

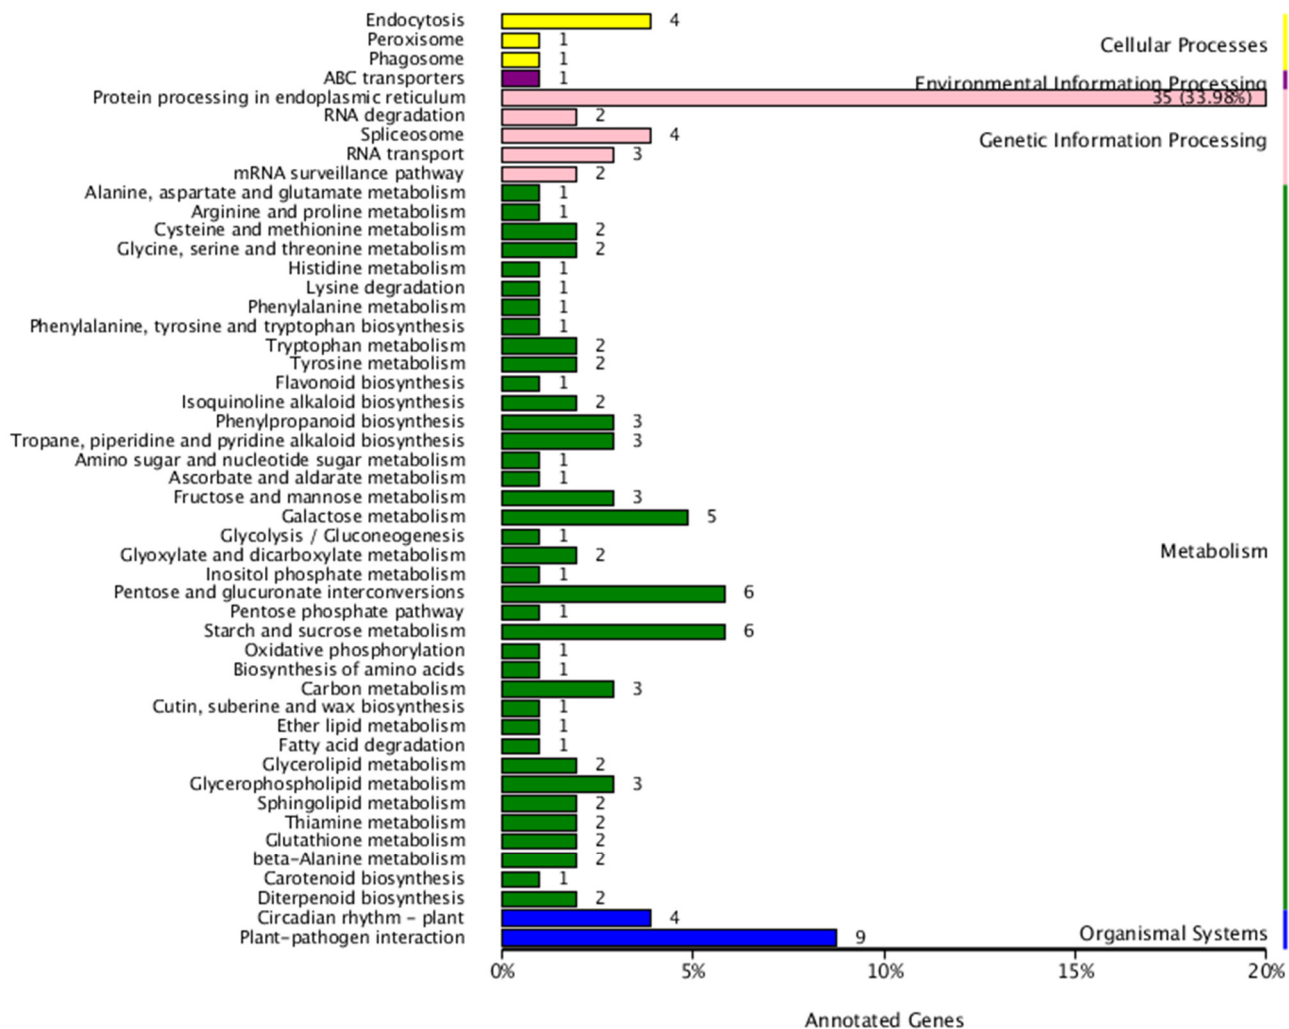

Table S1. Changes of free monoterpenes profiles in Muscat Hamburg grape at six developmental stages.

| Free monoterpenes (µg/L)   | E-L 35      |             |             | E-L 35.5    |             |             | E-L 36      |             |             |
|----------------------------|-------------|-------------|-------------|-------------|-------------|-------------|-------------|-------------|-------------|
|                            | L           | M           | H           | L           | M           | H           | L           | M           | H           |
| β-Myrcene                  | 2.71±0.01b  | 2.86±0.08a  | 2.95±0.04a  | 5.89±0.22a  | 4.65±0.12b  | 3.75±0.04c  | 9.51±0.97c  | 15.96±0.05a | 13.56±1.19b |
| Limonene                   | 0.63±0.03c  | 1.18±0.04b  | 1.34±0.06a  | 2.48±0.18c  | 3.00±0.02a  | 2.79±0.03b  | 5.32±0.04c  | 13.64±0.27a | 10.59±0.03b |
| Phellandrene               | 0.48±0.02c  | 0.61±0.01b  | 0.68±0.01a  | 1.00±0.04a  | 0.85±0.01b  | 0.82±0.01b  | 1.82±0.01c  | 2.93±0.01a  | 2.63±0.04b  |
| β-trans-Ocimene            | 2.48±0.01c  | 2.52±0.00b  | 2.55±0.01a  | 3.55±0.11a  | 3.30±0.03b  | 3.04±0.02c  | 5.31±0.04c  | 8.21±0.01a  | 7.74±0.02b  |
| γ-Terpinen                 | 1.30±0.04c  | 1.99±0.01b  | 2.13±0.09a  | 1.09±0.02c  | 1.32±0.01b  | 1.71±0.02a  | 1.18±0.01c  | 1.90±0.01a  | 1.68±0.01b  |
| β-cis-Ocimene              | 2.52±0.01c  | 2.58±0.02b  | 2.65±0.03a  | 4.10±0.16a  | 3.78±0.03b  | 3.47±0.01c  | 6.78±0.01c  | 11.55±0.05a | 10.67±0.07b |
| Terpinolen                 | 1.04±0.02c  | 1.28±0.01b  | 1.36±0.03a  | 1.22±0.03c  | 1.59±0.01b  | 1.69±0.02a  | 1.67±0.04c  | 4.46±0.08a  | 3.55±0.03b  |
| Cis rose oxide             | 1.08±0.01a  | 1.08±0.02a  | 1.08±0.01a  | 1.17±0.01a  | 1.13±0.02b  | 1.12±0.01b  | 1.34±0.02a  | 1.30±0.01b  | 1.35±0.01a  |
| Trans rose oxide           | nd          | nd          | nd          | nd          | nd          | nd          | 0.46±0.02a  | 0.08±0.01c  | 0.24±0.01b  |
| Allo-Ocimene               | 2.41±0.01c  | 2.47±0.01b  | 2.50±0.02a  | 2.65±0.03a  | 2.68±0.01a  | 2.67±0.01a  | 3.05±0.02c  | 4.00±0.04a  | 3.75±0.02b  |
| (E,Z) Allo-Ocimene         | 2.39±0.01b  | 2.45±0.03a  | 2.46±0.02a  | 2.52±0.02a  | 2.53±0.01a  | 2.49±0.01b  | 2.78±0.01c  | 3.16±0.03a  | 3.04±0.02b  |
| Cis-furan linalool oxide   | 0.12±0.01c  | 0.34±0.02b  | 0.57±0.03a  | 0.55±0.02b  | 0.68±0.02a  | 0.68±0.01a  | 0.85±0.01c  | 1.71±0.08a  | 1.34±0.01b  |
| Trans-furan linalool oxide | 0.18±0.01b  | 0.16±0.01c  | 0.27±0.01a  | 0.68±0.02a  | 0.49±0.01b  | 0.38±0.01c  | 1.31±0.01c  | 1.79±0.04a  | 1.46±0.03b  |
| Nerol oxide                | 13.33±0.06b | 12.83±0.01c | 14.09±0.04a | 18.90±0.28b | 20.47±0.01a | 20.69±0.12a | 22.29±0.29c | 33.05±0.54a | 30.41±0.30b |
| Citronellal                | 1.47±0.03a  | 1.73±0.01a  | 1.69±0.29a  | 1.61±0.01b  | 1.75±0.04a  | 1.79±0.01a  | 1.61±0.04b  | 2.17±0.02a  | 2.03±0.17a  |
| Linalool                   | 3.40±0.05a  | 3.26±0.03b  | 3.22±0.02b  | 26.03±0.29a | 12.67±0.37b | 7.95±0.11c  | 59.65±0.74b | 68.03±0.38a | 69.08±0.57a |
| 4-Terpineol                | 1.53±0.03b  | 2.36±0.01a  | 2.37±0.01a  | 1.43±0.01c  | 1.64±0.02b  | 1.81±0.02a  | 1.45±0.01c  | 1.97±0.01a  | 1.78±0.04b  |
| Neral                      | 1.06±0.04a  | 1.07±0.01a  | 1.09±0.04a  | 1.13±0.02a  | 1.08±0.03c  | 1.11±0.01b  | 1.10±0.02b  | 1.29±0.05ab | 1.32±0.17a  |
| α-Terpineol                | 7.50±0.07c  | 9.78±0.03b  | 10.59±0.07a | 9.89±0.34b  | 15.34±0.22a | 15.66±0.45a | 14.10±0.61c | 47.55±1.30a | 35.88±0.45b |
| Geranial                   | 1.12±0.01b  | 1.10±0.01c  | 1.15±0.01a  | 1.50±0.02a  | 1.40±0.05b  | 1.37±0.05b  | 1.57±0.02b  | 1.87±0.02a  | 1.97±0.10a  |
| β-Citronellol              | 1.76±0.01a  | 1.73±0.01a  | 1.79±0.11a  | 1.92±0.02a  | 1.89±0.02b  | 1.82±0.01c  | 1.96±0.01b  | 1.96±0.01b  | 2.08±0.02a  |
| γ-geraniol                 | 5.25±0.01a  | 5.25±0.01a  | 5.26±0.01a  | 5.26±0.01a  | 5.25±0.01a  | 5.25±0.02a  | 5.25±0.02a  | 5.26±0.01a  | 5.27±0.01a  |
| Nerol                      | 10.06±0.01a | 10.05±0.02a | 10.06±0.01a | 10.57±0.02a | 10.32±0.02b | 10.20±0.01c | 10.71±0.03c | 11.68±0.06a | 11.56±0.04b |

|                   |              |              |              |              |              |              |              |              |              |
|-------------------|--------------|--------------|--------------|--------------|--------------|--------------|--------------|--------------|--------------|
| Cis-isogeraniol   | nd           | 0.61±0.02b   | 1.09±0.19a   | 0.34±0.06c   | 1.19±0.18b   | 1.66±0.08a   | 0.32±0.06b   | 1.41±0.08a   | 1.41±0.26a   |
| Trans-isogeraniol | nd           | 0.87±0.03b   | 1.19±0.15a   | 0.38±0.06b   | 1.66±0.13a   | 1.79±0.18a   | 0.31±0.01c   | 1.86±0.03a   | 1.54±0.08b   |
| Geraniol          | 38.01±0.02a  | 37.28±0.03b  | 37.34±0.06b  | 45.25±0.33a  | 43.49±0.26b  | 39.69±0.12c  | 45.92±0.39b  | 56.87±0.44a  | 56.42±0.23a  |
| Geranic acid      | 37.05±0.01c  | 37.18±0.05b  | 37.34±0.01a  | 38.36±0.04b  | 39.51±0.05a  | 37.73±0.01c  | 38.00±0.12b  | 38.07±0.06b  | 39.06±0.20a  |
| Total             | 138.86±0.45c | 144.60±0.33b | 148.92±0.48a | 189.47±2.23a | 183.65±1.24b | 173.13±0.62c | 245.61±0.65c | 343.72±2.44a | 321.40±2.00b |

Data are presented as mean ± standard error (n=3). Different letters indicate significant differences (Duncan's multiple range test,  $p \leq 0.05$ ); nd represents not detected.

Continued Table S1.

| Free monoterpenes (µg/L)   | E-L 37       |              |              | E-L 37.5     |              |              | E-L 38       |               |              |
|----------------------------|--------------|--------------|--------------|--------------|--------------|--------------|--------------|---------------|--------------|
|                            | L            | M            | H            | L            | M            | H            | L            | M             | H            |
| β-Myrcene                  | 23.27±0.57b  | 26.63±1.56a  | 22.78±0.16b  | 38.06±1.76a  | 31.24±0.19c  | 35.33±0.61b  | 132.61±5.82c | 162.29±2.81a  | 150.89±3.04b |
| Limonene                   | 13.13±0.22c  | 22.78±1.24a  | 15.68±0.07b  | 26.83±0.62a  | 26.26±0.43a  | 18.63±0.03b  | 80.12±2.70c  | 100.83±2.22a  | 85.20±2.28b  |
| Phellandrene               | 3.61±0.08b   | 4.81±0.05a   | 3.63±0.02b   | 6.28±0.25a   | 5.45±0.08b   | 5.30±0.08b   | 13.26±0.24c  | 17.83±0.08a   | 15.97±0.37b  |
| β-trans-Ocimene            | 10.48±0.20b  | 13.08±0.50a  | 10.98±0.02b  | 17.13±1.33a  | 15.24±0.01b  | 15.93±0.15ab | 60.25±3.44c  | 74.26±3.18a   | 66.60±2.54b  |
| γ-Terpinen                 | 1.57±0.01c   | 2.34±0.08a   | 1.76±0.02b   | 2.18±0.04b   | 2.34±0.01a   | 1.88±0.02c   | 4.98±0.22b   | 6.26±0.29a    | 5.03±0.06b   |
| β-cis-Ocimene              | 14.57±0.36c  | 19.40±0.47a  | 15.80±0.06b  | 24.47±1.40a  | 22.52±0.16b  | 22.66±0.23b  | 99.36±4.92b  | 132.63±13.18a | 116.1±3.99ab |
| Terpinolen                 | 3.30±0.07c   | 6.69±0.27a   | 4.77±0.02b   | 6.77±0.05b   | 7.80±0.03a   | 4.66±0.08c   | 21.50±0.30b  | 26.92±0.35a   | 20.55±0.31c  |
| Cis rose oxide             | 1.43±0.01a   | 1.41±0.02a   | 1.38±0.02b   | 1.52±0.03b   | 1.41±0.01c   | 1.95±0.01a   | 2.00±0.03c   | 2.80±0.06b    | 2.93±0.05a   |
| Trans rose oxide           | 0.66±0.03a   | 0.19±0.01c   | 0.34±0.01b   | 0.65±0.07b   | 0.28±0.01c   | 1.88±0.05a   | 1.54±0.09c   | 2.98±0.08b    | 3.52±0.12a   |
| Allo-Ocimene               | 4.16±0.06c   | 5.40±0.15a   | 4.58±0.02b   | 5.79±0.03a   | 5.72±0.01b   | 5.08±0.01c   | 21.13±0.71c  | 25.51±0.25a   | 22.79±0.37b  |
| (E,Z) Allo-Ocimene         | 3.49±0.06b   | 3.79±0.05a   | 3.46±0.01b   | 4.34±0.13a   | 4.02±0.07b   | 4.02±0.02b   | 10.07±0.53b  | 12.41±0.71a   | 10.78±0.45b  |
| Cis-furan linalool oxide   | 2.47±0.01c   | 3.29±0.11a   | 2.15±0.01b   | 4.74±0.10a   | 3.84±0.01b   | 3.76±0.03b   | 4.11±0.01c   | 4.48±0.02b    | 4.53±0.03a   |
| Trans-furan linalool oxide | 1.84±0.01b   | 1.96±0.02a   | 1.33±0.04c   | 2.22±0.05a   | 1.80±0.01b   | 1.85±0.01b   | 2.89±0.02b   | 3.18±0.02a    | 3.16±0.01a   |
| Nerol oxide                | 23.71±0.04c  | 38.51±2.28a  | 26.97±0.12b  | 29.78±0.25b  | 33.35±0.11a  | 26.91±0.06c  | 53.62±0.16c  | 88.37±0.66a   | 71.00±0.47b  |
| Citronellal                | 1.91±0.01b   | 2.88±0.05a   | 2.02±0.09b   | 2.34±0.06b   | 2.60±0.04a   | 2.23±0.06b   | 2.41±0.01c   | 3.06±0.01a    | 2.65±0.01b   |
| Linalool                   | 132.49±3.09a | 118.33±4.21b | 119.39±0.29b | 203.89±4.76b | 140.53±0.69c | 210.7±2.86a  | 338.42±3.64b | 395.4±14.85a  | 406.72±8.37a |
| 4-Terpineol                | 1.62±0.02c   | 2.19±0.09a   | 1.82±0.01b   | 2.04±0.03b   | 2.29±0.01a   | 1.72±0.01c   | 3.54±0.09c   | 4.99±0.01a    | 3.94±0.12b   |
| Neral                      | 1.18±0.01b   | 1.45±0.09a   | 1.22±0.05b   | 1.40±0.09b   | 1.22±0.02c   | 1.52±0.01a   | 1.68±0.01b   | 2.01±0.10a    | 1.96±0.03a   |
| α-Terpineol                | 27.4±1.78c   | 73.39±8.67a  | 48.01±0.46b  | 75.32±5.15b  | 96.88±3.85a  | 37.21±0.81c  | 182.01±5.04c | 250.21±0.94a  | 202.09±3.73b |
| Geranial                   | 2.01±0.04c   | 2.31±0.09a   | 2.19±0.01b   | 2.87±0.13a   | 2.29±0.02c   | 2.44±0.01b   | 4.30±0.05c   | 4.99±0.13b    | 5.18±0.07a   |
| β-Citronellol              | 2.12±0.01a   | 2.09±0.05a   | 2.12±0.02a   | 2.34±0.04a   | 2.04±0.01c   | 2.26±0.01b   | 5.33±0.03b   | 4.35±0.11c    | 6.01±0.11a   |
| γ-geraniol                 | 5.26±0.01a   | 5.28±0.01a   | 5.27±0.02a   | 5.28±0.02a   | 5.27±0.01a   | 5.27±0.02a   | 13.67±0.18b  | 11.79±0.35c   | 15.26±0.13a  |
| Nerol                      | 11.57±0.14c  | 12.98±0.13a  | 12.46±0.04b  | 13.96±0.16a  | 14.02±0.01a  | 12.27±0.04b  | 80.47±0.80c  | 95.24±2.39a   | 91.19±0.95b  |

|                   |              |              |              |              |              |              |                |               |               |
|-------------------|--------------|--------------|--------------|--------------|--------------|--------------|----------------|---------------|---------------|
| Cis-isogeraniol   | 0.33±0.03c   | 1.66±0.03a   | 1.35±0.02b   | 1.06±0.01b   | 1.37±0.03a   | 0.50±0.01c   | 3.91±0.04a     | 3.37±0.02c    | 3.74±0.01b    |
| Trans-isogeraniol | 0.31±0.02c   | 1.58±0.07a   | 1.32±0.01b   | 1.09±0.03b   | 1.66±0.12a   | 0.44±0.02c   | 3.79±0.02b     | 5.72±0.26a    | 3.97±0.07b    |
| Geraniol          | 57.10±1.52c  | 71.91±1.85a  | 67.73±0.48b  | 82.31±2.27a  | 83.82±0.3a   | 62.19±0.51b  | 235.31±1.86b   | 256.88±4.55a  | 250.66±3.45a  |
| Geranic acid      | 39.58±0.27b  | 39.21±0.21b  | 40.35±0.07a  | 40.49±0.05a  | 38.68±0.19b  | 38.52±0.01b  | 98.29±12.25a   | 66.35±3.30b   | 79.99±2.60b   |
| Total             | 390.55±8.46c | 485.55±1.98a | 420.88±0.99b | 605.16±2.94a | 553.94±3.73b | 527.12±2.51c | 1480.57±27.07c | 1765.13±5.10a | 1652.41±6.33b |



Table S2. Changes of bound monoterpenes profiles in Muscat Hamburg grape at six developmental stages.

| Bound monoterpenes (µg/L)  | E-L 35      |             |             | E-L 35.5     |             |              | E-L 36       |              |              |
|----------------------------|-------------|-------------|-------------|--------------|-------------|--------------|--------------|--------------|--------------|
|                            | L           | M           | H           | L            | M           | H            | L            | M            | H            |
| β-Myrcene                  | 14.44±0.05c | 16.16±0.18a | 15.61±0.15b | 18.01±0.40b  | 20.15±0.05a | 17.86±0.06b  | 22.68±0.77b  | 26.60±0.30a  | 21.83±1.15b  |
| Limonene                   | 2.38±0.02b  | 2.62±0.14a  | 2.48±0.02ab | 3.92±0.16a   | 3.76±0.10a  | 3.10±0.05b   | 6.47±0.12b   | 7.30±0.25a   | 5.39±0.62c   |
| Phellandrene               | 1.93±0.03c  | 2.12±0.03a  | 2.02±0.01b  | 2.69±0.07a   | 2.71±0.05a  | 2.38±0.02b   | 3.57±0.12b   | 3.85±0.03a   | 3.61±0.10b   |
| β-trans-Ocimene            | 12.46±0.03a | 12.37±0.45a | 12.76±0.01a | 13.25±0.09a  | 13.54±0.40a | 13.14±0.02a  | 14.90±0.07b  | 15.89±0.25a  | 14.68±0.04b  |
| γ-Terpinen                 | 4.52±0.02a  | 4.52±0.07a  | 4.53±0.03a  | 4.57±0.01ab  | 4.60±0.05a  | 4.54±0.01b   | 4.54±0.12b   | 4.75±0.02a   | 4.62±0.04ab  |
| β-cis-Ocimene              | 12.79±0.02a | 12.57±0.78a | 13.28±0.02a | 14.11±0.17b  | 14.78±0.17a | 13.88±0.06b  | 16.83±0.18b  | 18.55±0.35a  | 17.05±0.08b  |
| Terpinolen                 | 4.52±0.01a  | 4.53±0.06a  | 4.54±0.02a  | 4.63±0.01a   | 4.55±0.04b  | 4.59±0.01ab  | 4.65±0.19b   | 5.10±0.06a   | 4.87±0.01b   |
| Cis rose oxide             | 5.47±0.01a  | 5.44±0.09a  | 5.50±0.01a  | 5.90±0.03a   | 5.50±0.05b  | 5.86±0.01a   | 6.44±0.09b   | 6.88±0.04a   | 6.81±0.05a   |
| Trans rose oxide           | nd          | nd          | nd          | 0.69±0.15a   | nd          | 0.36±0.02b   | 2.81±0.01b   | 3.58±0.04a   | 3.54±0.20a   |
| Allo-Ocimene               | 12.08±0.01a | 12.08±0.11a | 12.16±0.03a | 12.26±0.02b  | 12.40±0.04a | 12.29±0.01b  | 12.28±0.31b  | 12.88±0.07a  | 12.62±0.02ab |
| (E,Z) Allo-Ocimene         | 12.03±0.01a | 12.03±0.07a | 12.02±0.02a | 12.12±0.01ab | 12.16±0.05a | 12.07±0.01b  | 12.15±0.17a  | 12.33±0.01a  | 12.23±0.01a  |
| Cis-furan linalool oxide   | 0.46±0.02c  | 0.79±0.01a  | 0.53±0.01b  | 1.38±0.12b   | 3.42±0.02a  | 0.77±0.01c   | 2.08±0.03b   | 4.76±0.58a   | 2.71±0.10b   |
| Trans-furan linalool oxide | 0.71±0.01c  | 1.89±0.01a  | 0.93±0.03b  | 1.15±0.16b   | 3.15±0.05a  | 1.12±0.17b   | 1.48±0.03b   | 3.27±0.58a   | 1.86±0.04b   |
| Nerol oxide                | 67.52±0.39a | 66.87±6.64a | 70.86±0.32a | 100.99±2.75a | 84.54±5.57b | 102.77±1.41a | 116.49±1.05c | 168.34±6.87a | 141.37±0.31b |
| Citronellal                | 6.47±0.04c  | 8.75±0.04a  | 7.52±0.05b  | 6.60±0.14b   | 6.38±0.05b  | 7.33±0.23a   | 6.52±0.01c   | 7.79±0.01a   | 7.54±0.09b   |
| Linalool                   | 12.19±0.05c | 13.37±0.15a | 12.53±0.03b | 19.12±0.65a  | 19.79±0.08a | 16.46±0.14b  | 37.35±0.19c  | 63.18±3.68a  | 44.35±0.26b  |
| 4-Terpineol                | 6.89±0.02c  | 8.44±0.13a  | 7.27±0.05b  | 6.80±0.02c   | 7.27±0.06a  | 6.88±0.01b   | 6.66±0.10c   | 7.34±0.15a   | 6.97±0.03b   |
| Neral                      | 11.78±0.93b | 22.72±0.59a | 23.38±0.36a | 27.96±1.08b  | 40.83±0.82a | 40.10±2.49a  | 45.82±0.77c  | 81.48±3.05b  | 92.28±2.17a  |
| α-Terpineol                | 41.26±0.36c | 60.85±0.69a | 47.79±0.48b | 39.75±0.49c  | 47.62±0.45a | 40.99±0.18b  | 41.29±0.12c  | 52.58±2.65a  | 45.97±0.38b  |
| Geranial                   | 11.72±0.96c | 30.84±0.73a | 28.37±1.65b | 24.15±1.57c  | 53.84±0.85a | 40.85±2.83b  | 38.75±0.72c  | 96.83±9.40a  | 78.02±2.64b  |
| β-Citronellol              | 10.25±0.01c | 12.59±0.05a | 12.10±0.09b | 12.02±0.45a  | 12.58±0.46a | 12.66±0.30a  | 18.01±0.61b  | 19.80±0.96a  | 18.98±0.21ab |
| γ-geraniol                 | 5.27±0.01a  | 5.27±0.03a  | 5.28±0.02a  | 5.28±0.01a   | 5.29±0.04a  | 5.30±0.02a   | 5.28±0.03b   | 5.35±0.01a   | 5.33±0.01a   |
| Nerol                      | 58.93±0.17a | 58.70±0.65a | 58.97±0.90a | 77.87±1.39a  | 74.08±0.06b | 70.04±0.38c  | 97.19±2.14b  | 100.53±1.13a | 97.60±0.30b  |

|                   |              |               |               |               |               |               |               |               |               |
|-------------------|--------------|---------------|---------------|---------------|---------------|---------------|---------------|---------------|---------------|
| Cis-isogeraniol   | nd           | nd            | nd            | 1.66±0.08a    | 1.51±0.03a    | 1.59±0.14a    | 2.66±0.05b    | 3.84±0.19a    | 3.37±0.41a    |
| Trans-isogeraniol | nd           | nd            | nd            | 3.24±0.14b    | 3.83±0.06a    | 3.37±0.26b    | 6.99±0.08b    | 8.95±1.04a    | 8.21±0.14a    |
| Geraniol          | 258.42±1.18c | 357.89±1.08a  | 331.31±1.45b  | 324.51±8.73c  | 437.61±1.73a  | 375.85±2.86b  | 379.89±4.49b  | 472.48±31.57a | 411.7±10.88b  |
| Geranic acid      | 274.42±7.66c | 344.45±1.46b  | 363.19±4.40a  | 263.83±10.6c  | 335.12±4.04a  | 316.39±9.13b  | 285.12±1.59b  | 357.94±39.18a | 317.37±10.97a |
| Total             | 849.24±11.40 | 1077.87±10.50 | 1054.92±16.73 | 1008.44±29.29 | 1231.02±21.13 | 1132.54±17.48 | 1198.91±20.68 | 1572.18±94.97 | 1390.85±28.70 |
|                   | b            | a             | a             | c             | a             | b             | c             | a             | b             |

Data are presented as mean ± standard error (n=3). Different letters indicate significant differences (Duncan's multiple range test,  $p \leq 0.05$ ); nd represents not detected.

Continued Table S2.

| Bound monoterpenes<br>( $\mu\text{g/L}$ ) | E-L 37             |                    |                    | E-L 37.5           |                    |                    | E-L 38             |                    |                    |
|-------------------------------------------|--------------------|--------------------|--------------------|--------------------|--------------------|--------------------|--------------------|--------------------|--------------------|
|                                           | L                  | M                  | H                  | L                  | M                  | H                  | L                  | M                  | H                  |
| $\beta$ -Myrcene                          | 33.53 $\pm$ 0.07a  | 32.10 $\pm$ 0.66b  | 28.85 $\pm$ 0.58c  | 40.50 $\pm$ 0.16a  | 27.79 $\pm$ 0.05c  | 32.32 $\pm$ 0.78b  | 73.21 $\pm$ 2.03a  | 46.55 $\pm$ 1.34c  | 52.08 $\pm$ 2.89b  |
| Limonene                                  | 9.57 $\pm$ 0.51a   | 9.50 $\pm$ 0.23a   | 8.40 $\pm$ 0.60b   | 12.79 $\pm$ 0.24a  | 11.40 $\pm$ 0.04b  | 9.83 $\pm$ 0.36c   | 27.38 $\pm$ 0.74a  | 15.89 $\pm$ 0.73c  | 17.88 $\pm$ 0.86b  |
| Phellandrene                              | 4.92 $\pm$ 0.02a   | 4.69 $\pm$ 0.05b   | 4.59 $\pm$ 0.16b   | 5.99 $\pm$ 0.02a   | 5.33 $\pm$ 0.19b   | 5.03 $\pm$ 0.12c   | 9.59 $\pm$ 0.12a   | 5.99 $\pm$ 0.15c   | 6.77 $\pm$ 0.32b   |
| $\beta$ -trans-Ocimene                    | 17.20 $\pm$ 0.13ab | 17.69 $\pm$ 0.14a  | 16.70 $\pm$ 0.60b  | 19.98 $\pm$ 0.21a  | 19.37 $\pm$ 0.02b  | 17.87 $\pm$ 0.32c  | 32.38 $\pm$ 0.94a  | 23.28 $\pm$ 0.55b  | 24.23 $\pm$ 0.49b  |
| $\gamma$ -Terpinen                        | 4.81 $\pm$ 0.03ab  | 4.84 $\pm$ 0.02a   | 4.67 $\pm$ 0.13b   | 4.97 $\pm$ 0.01a   | 4.91 $\pm$ 0.01b   | 4.84 $\pm$ 0.01c   | 5.68 $\pm$ 0.07a   | 5.13 $\pm$ 0.03b   | 5.14 $\pm$ 0.04b   |
| $\beta$ -cis-Ocimene                      | 21.53 $\pm$ 0.09a  | 21.37 $\pm$ 0.17a  | 19.98 $\pm$ 0.66b  | 25.46 $\pm$ 0.31a  | 22.45 $\pm$ 1.68b  | 21.73 $\pm$ 0.61b  | 46.59 $\pm$ 1.50a  | 30.99 $\pm$ 0.89b  | 32.21 $\pm$ 0.30b  |
| Terpinolen                                | 5.18 $\pm$ 0.34a   | 5.33 $\pm$ 0.01a   | 4.96 $\pm$ 0.04a   | 5.83 $\pm$ 0.02a   | 5.61 $\pm$ 0.05b   | 5.10 $\pm$ 0.04c   | 6.89 $\pm$ 0.07a   | 5.78 $\pm$ 0.07c   | 5.97 $\pm$ 0.07b   |
| Cis rose oxide                            | 8.76 $\pm$ 0.14a   | 7.23 $\pm$ 0.01b   | 6.80 $\pm$ 0.06c   | 8.63 $\pm$ 0.01a   | 7.64 $\pm$ 0.03b   | 7.77 $\pm$ 0.14b   | 9.70 $\pm$ 0.1a    | 8.01 $\pm$ 0.07c   | 8.94 $\pm$ 0.12b   |
| Trans rose oxide                          | 9.26 $\pm$ 0.11a   | 4.78 $\pm$ 0.15b   | 3.50 $\pm$ 0.17c   | 9.44 $\pm$ 0.01a   | 6.14 $\pm$ 0.15c   | 6.69 $\pm$ 0.37b   | 13.06 $\pm$ 0.24a  | 7.40 $\pm$ 0.23c   | 10.19 $\pm$ 0.45b  |
| Allo-Ocimene                              | 13.55 $\pm$ 0.09a  | 13.17 $\pm$ 0.02b  | 12.91 $\pm$ 0.06c  | 13.93 $\pm$ 0.01a  | 13.56 $\pm$ 0.01b  | 13.14 $\pm$ 0.07c  | 18.54 $\pm$ 0.19a  | 15.49 $\pm$ 0.14c  | 15.96 $\pm$ 0.14b  |
| (E,Z) Allo-Ocimene                        | 12.47 $\pm$ 0.01a  | 12.49 $\pm$ 0.01a  | 12.38 $\pm$ 0.06b  | 12.69 $\pm$ 0.01a  | 12.63 $\pm$ 0.02b  | 12.50 $\pm$ 0.02c  | 15.33 $\pm$ 0.15a  | 13.81 $\pm$ 0.09b  | 14.00 $\pm$ 0.07b  |
| Cis-furan linalool oxide                  | 8.91 $\pm$ 0.48a   | 6.22 $\pm$ 0.10b   | 2.79 $\pm$ 0.11c   | 13.19 $\pm$ 0.28a  | 6.88 $\pm$ 0.06b   | 4.95 $\pm$ 0.22c   | 12.76 $\pm$ 0.04a  | 12.28 $\pm$ 0.01c  | 12.52 $\pm$ 0.03b  |
| Trans-furan linalool oxide                | 3.90 $\pm$ 0.52a   | 2.48 $\pm$ 0.15b   | 1.61 $\pm$ 0.07c   | 3.87 $\pm$ 0.02a   | 2.96 $\pm$ 0.20b   | 1.60 $\pm$ 0.13c   | 11.72 $\pm$ 0.01a  | 11.65 $\pm$ 0.01b  | 11.68 $\pm$ 0.01b  |
| Nerol oxide                               | 206.64 $\pm$ 3.10a | 160.85 $\pm$ 1.36b | 103.7 $\pm$ 0.67c  | 205.46 $\pm$ 1.22a | 168.37 $\pm$ 0.17b | 110.31 $\pm$ 3.35c | 87.25 $\pm$ 1.79a  | 44.01 $\pm$ 0.83c  | 55.98 $\pm$ 2.05b  |
| Citronellal                               | 8.21 $\pm$ 0.14a   | 7.57 $\pm$ 0.12b   | 7.57 $\pm$ 0.24b   | 8.53 $\pm$ 0.06a   | 8.22 $\pm$ 0.12b   | 7.35 $\pm$ 0.05c   | 6.17 $\pm$ 0.05a   | 5.80 $\pm$ 0.06c   | 5.94 $\pm$ 0.05b   |
| Linalool                                  | 137.92 $\pm$ 4.65a | 90.31 $\pm$ 1.33b  | 69.59 $\pm$ 3.47c  | 199.98 $\pm$ 1.61a | 132.33 $\pm$ 1.04b | 91.91 $\pm$ 3.30c  | 132.76 $\pm$ 2.22a | 79.87 $\pm$ 0.64c  | 87.42 $\pm$ 2.24b  |
| 4-Terpineol                               | 7.64 $\pm$ 0.08a   | 7.37 $\pm$ 0.01b   | 6.74 $\pm$ 0.02c   | 7.43 $\pm$ 0.02a   | 7.30 $\pm$ 0.02b   | 6.76 $\pm$ 0.01c   | 0.73 $\pm$ 0.03a   | 0.40 $\pm$ 0.01b   | 0.46 $\pm$ 0.06b   |
| Neral                                     | 112.90 $\pm$ 1.93a | 83.91 $\pm$ 1.50c  | 105.00 $\pm$ 3.33b | 117.58 $\pm$ 1.45b | 90.23 $\pm$ 0.89c  | 126.53 $\pm$ 6.13a | 187.75 $\pm$ 5.46a | 101.01 $\pm$ 2.68c | 123.03 $\pm$ 5.53b |
| $\alpha$ -Terpineol                       | 62.99 $\pm$ 0.21a  | 54.58 $\pm$ 0.28b  | 42.49 $\pm$ 0.48c  | 68.01 $\pm$ 0.57a  | 56.11 $\pm$ 0.26b  | 45.02 $\pm$ 0.58c  | 53.06 $\pm$ 0.39a  | 44.14 $\pm$ 0.11c  | 46.03 $\pm$ 0.50b  |
| Geranial                                  | 112.79 $\pm$ 2.71a | 93.75 $\pm$ 7.51b  | 58.94 $\pm$ 1.41c  | 121.37 $\pm$ 6.27a | 103.05 $\pm$ 0.97b | 70.69 $\pm$ 4.50c  | 133.24 $\pm$ 3.76a | 74.19 $\pm$ 5.67c  | 96.38 $\pm$ 3.40b  |
| $\beta$ -Citronellol                      | 29.28 $\pm$ 0.93a  | 22.44 $\pm$ 0.19c  | 24.31 $\pm$ 1.27b  | 32.76 $\pm$ 0.44b  | 28.6 $\pm$ 0.47c   | 34.32 $\pm$ 0.82a  | 55.03 $\pm$ 0.59a  | 34.25 $\pm$ 0.38c  | 41.56 $\pm$ 1.99b  |
| $\gamma$ -geraniol                        | 5.44 $\pm$ 0.03a   | 5.36 $\pm$ 0.02b   | 5.37 $\pm$ 0.01b   | 5.41 $\pm$ 0.01a   | 5.40 $\pm$ 0.02a   | 5.40 $\pm$ 0.01a   | 105.34 $\pm$ 1.10a | 53.90 $\pm$ 1.01c  | 68.28 $\pm$ 4.27b  |

|                   |               |               |               |               |              |               |               |               |               |
|-------------------|---------------|---------------|---------------|---------------|--------------|---------------|---------------|---------------|---------------|
| Nerol             | 125.37±0.81a  | 113.50±1.35b  | 125.94±0.40a  | 123.68±0.82b  | 124.62±0.64b | 131.26±1.68a  | 626.15±0.69a  | 331.83±7.88c  | 389.2±29.02b  |
| Cis-isogeraniol   | 6.24±0.06a    | 4.56±0.21b    | 4.41±0.05b    | 6.60±0.26a    | 6.13±0.09b   | 5.40±0.23c    | 6.78±0.23a    | 6.35±0.06b    | 5.51±0.18c    |
| Trans-isogeraniol | 17.74±0.10a   | 12.70±0.11b   | 12.07±0.42c   | 20.57±0.73a   | 16.21±0.55c  | 18.75±0.89b   | 4.91±2.60a    | 4.88±4.66a    | 5.57±2.83a    |
| Geraniol          | 551.23±6.77a  | 486.88±1.21b  | 481.08±8.08b  | 518.60±10.75b | 548.61±1.32a | 467.68±10.43c | 734.09±2.82a  | 465.27±1.32c  | 496.08±17.95b |
| Geranic acid      | 383.43±0.99a  | 370.69±2.52b  | 350.23±7.40c  | 416.11±22.89a | 416.48±1.74a | 322.48±7.97b  | 600.49±10.92a | 426.22±8.07b  | 414.04±13.16b |
| Total             | 1921.40±10.34 | 1656.36±11.10 | 1525.55±26.82 | 2029.35±30.98 | 1858.33±9.21 | 1587.23±42.72 | 3046.97±44.75 | 1887.14±13.45 | 2071.54±82.71 |
|                   | a             | b             | c             | a             | b            | c             | a             | c             | b             |

---

Table S3. Sequencing Data Statistics.

| Treatment | Sample ID | Total Reads | Clean reads | Mapped Reads     | Average reads | Average mapped reads | GC Content | Q20 (%) | Q30 (%) |
|-----------|-----------|-------------|-------------|------------------|---------------|----------------------|------------|---------|---------|
| H-EL35    | H-EL35-1  | 43441260    | 21720630    | 39929418(91.92%) | 45343466      | 41599261             | 46.77      | 97.76   | 93.53   |
|           | H-EL35-2  | 53696502    | 26848251    | 49498546(92.18%) | 45343466      | 41599261             | 46.64      | 97.64   | 93.28   |
|           | H-EL35-3  | 38892636    | 19446318    | 35369819(90.94%) | 45343466      | 41599261             | 47.02      | 97.31   | 92.6    |
| H-EL36    | H-EL36-1  | 41172052    | 20586026    | 37706238(91.58%) | 42954600      | 39307590             | 47.64      | 97.28   | 92.62   |
|           | H-EL36-2  | 44735290    | 22367645    | 40711821(91.01%) | 42954600      | 39307590             | 47.44      | 96.7    | 91.44   |
|           | H-EL36-3  | 42956458    | 21478229    | 39504711(91.96%) | 42954600      | 39307590             | 47.6       | 97.2    | 92.56   |
| H-EL38    | H-EL38-1  | 44426912    | 22213456    | 40765151(91.76%) | 42735361.33   | 39343824.33          | 47.51      | 97.28   | 92.83   |
|           | H-EL38-2  | 43239064    | 21619532    | 39951358(92.40%) | 42735361.33   | 39343824.33          | 47.4       | 97.38   | 93.09   |
|           | H-EL38-3  | 40540108    | 20270054    | 37314964(92.04%) | 42735361.33   | 39343824.33          | 47.29      | 97.11   | 92.53   |
| L-EL35    | L-EL35-1  | 41839150    | 20919575    | 38504639(92.03%) | 45636324.67   | 41691871.67          | 46.94      | 97.8    | 93.58   |
|           | L-EL35-2  | 50089344    | 25044672    | 45743722(91.32%) | 45636324.67   | 41691871.67          | 47.1       | 97.48   | 92.98   |
|           | L-EL35-3  | 44980480    | 22490240    | 40827254(90.77%) | 45636324.67   | 41691871.67          | 47.01      | 97.24   | 92.45   |
| L-EL36    | L-EL36-1  | 46154210    | 23077105    | 42363721(91.79%) | 42816332      | 39224074.67          | 47.6       | 97.43   | 92.98   |
|           | L-EL36-2  | 42520788    | 21260394    | 38737902(91.1%)  | 42816332      | 39224074.67          | 47.63      | 97.18   | 92.41   |
|           | L-EL36-3  | 39773998    | 19886999    | 36570601(91.95%) | 42816332      | 39224074.67          | 47.43      | 97.62   | 93.34   |
| L-EL38    | L-EL38-1  | 45160162    | 22580081    | 41003308(90.8%)  | 42597273.33   | 38688187.67          | 47.26      | 97.06   | 92.22   |
|           | L-EL38-2  | 40247578    | 20123789    | 36795792(91.42%) | 42597273.33   | 38688187.67          | 47.31      | 97.03   | 92.12   |
|           | L-EL38-3  | 42384080    | 21192040    | 38265463(90.28%) | 42597273.33   | 38688187.67          | 47.34      | 96.83   | 91.62   |
| M-EL35    | M-EL35-1  | 45414524    | 22707262    | 41468410(91.31%) | 44733675.33   | 40490283             | 47.17      | 97.78   | 93.62   |
|           | M-EL35-2  | 43889772    | 21944886    | 40451237(92.17%) | 44733675.33   | 40490283             | 46.73      | 97.74   | 93.51   |
|           | M-EL35-3  | 44896730    | 22448365    | 39551202(88.09%) | 44733675.33   | 40490283             | 47.03      | 97.53   | 93.05   |
| M-EL36    | M-EL36-1  | 47342896    | 23671448    | 43309894(91.48%) | 46010918.67   | 42127556.67          | 47.7       | 97.17   | 92.36   |
|           | M-EL36-2  | 44001640    | 22000820    | 40261789(91.5%)  | 46010918.67   | 42127556.67          | 47.67      | 97.3    | 92.69   |
|           | M-EL36-3  | 46688220    | 23344110    | 42810987(91.7%)  | 46010918.67   | 42127556.67          | 47.43      | 97.14   | 92.42   |

|        |          |          |          |                  |             |          |       |       |       |
|--------|----------|----------|----------|------------------|-------------|----------|-------|-------|-------|
| M-EL38 | M-EL38-1 | 44600152 | 22300076 | 41173307(92.32%) | 44042864.67 | 40127304 | 47.52 | 97.43 | 93.05 |
|        | M-EL38-2 | 44943596 | 22471798 | 41187068(91.64%) | 44042864.67 | 40127304 | 47.69 | 97.16 | 92.38 |
|        | M-EL38-3 | 42584846 | 21292423 | 38021537(89.28%) | 44042864.67 | 40127304 | 47.56 | 97.77 | 93.63 |

---

Total reads: the number of clean reads, calculated on a single-ended basis. Clean reads: total number of pair-end reads in clean data. Mapped reads: the number of reads mapped to the reference genome and the percentage of reads in clean reads. GC content: clean data GC content, that is, the percentage of bases G and C in the total base in clean data. Q20 and Q30 indicate the ratio of the number of bases in the filtered reads greater than 20 and 30 to the total number of bases, reflecting the quality of the sequencing data.

Table S4. KEGG enrichment analyses of DEGs

| ID                         | Pathway                                               | Number<br>of DEGs | Background<br>number | <i>p</i> -value(<0.05) |
|----------------------------|-------------------------------------------------------|-------------------|----------------------|------------------------|
| L-EL35 vs M-EL35 vs H-EL35 |                                                       |                   |                      |                        |
| ko00940                    | Phenylpropanoid biosynthesis                          | 23                | 230                  | $8.61 \times 10^{-7}$  |
| ko04141                    | Protein processing in endoplasmic reticulum           | 24                | 271                  | $4.35 \times 10^{-6}$  |
| ko00941                    | Flavonoid biosynthesis                                | 13                | 100                  | $1.47 \times 10^{-5}$  |
| ko00360                    | Phenylalanine metabolism                              | 11                | 79                   | $3.55 \times 10^{-5}$  |
| ko00945                    | Stilbenoid, diarylheptanoid and gingerol biosynthesis | 6                 | 24                   | $8.11 \times 10^{-5}$  |
| ko04075                    | Plant hormone signal transduction                     | 21                | 283                  | 0.000237626            |
| ko00910                    | Nitrogen metabolism                                   | 7                 | 46                   | 0.000560949            |
| ko00950                    | Isoquinoline alkaloid biosynthesis                    | 6                 | 43                   | 0.002219625            |
| ko00908                    | Zeatin biosynthesis                                   | 4                 | 23                   | 0.005518926            |
| ko00905                    | Brassinosteroid biosynthesis                          | 3                 | 13                   | 0.007213556            |
| ko00130                    | Ubiquinone and other terpenoid-quinone biosynthesis   | 6                 | 56                   | 0.008399053            |
| ko00350                    | Tyrosine metabolism                                   | 7                 | 76                   | 0.010266689            |
| ko00942                    | Anthocyanin biosynthesis                              | 1                 | 1                    | 0.031895554            |
| ko00196                    | Photosynthesis-antenna proteins                       | 3                 | 18                   | 0.01830882             |
| ko04933                    | AGE-RAGE signaling pathway in diabetic complications  | 3                 | 18                   | 0.01830882             |
| ko00906                    | Carotenoid biosynthesis                               | 4                 | 37                   | 0.029146387            |
| ko04626                    | Plant-pathogen interaction                            | 16                | 290                  | 0.022234561            |
| ko00250                    | Alanine, aspartate and glutamate metabolism           | 5                 | 56                   | 0.032173934            |
| L-EL36 vs M-EL36 vs H-EL36 |                                                       |                   |                      |                        |
| ko00196                    | Photosynthesis-antenna proteins                       | 8                 | 18                   | $4.08 \times 10^{-8}$  |
| ko00941                    | Flavonoid biosynthesis                                | 14                | 100                  | $4.25 \times 10^{-6}$  |
| ko04626                    | Plant-pathogen interaction                            | 23                | 290                  | $7.41 \times 10^{-5}$  |
| ko00940                    | Phenylpropanoid biosynthesis                          | 19                | 230                  | 0.000190976            |
| ko00052                    | Galactose metabolism                                  | 9                 | 70                   | 0.000445376            |
| ko00360                    | Phenylalanine metabolism                              | 9                 | 79                   | 0.001090753            |
| ko00906                    | Carotenoid biosynthesis                               | 6                 | 37                   | 0.001194022            |
| ko00945                    | Stilbenoid, diarylheptanoid and gingerol biosynthesis | 4                 | 24                   | 0.007320441            |
| ko00040                    | Pentose and glucuronate interconversions              | 9                 | 106                  | 0.008098434            |
| ko00261                    | Monobactam biosynthesis                               | 2                 | 9                    | 0.033579629            |
| ko00908                    | Zeatin biosynthesis                                   | 3                 | 23                   | 0.038723825            |
| ko04141                    | Protein processing in endoplasmic reticulum           | 16                | 271                  | 0.016961087            |
| L-EL38 vs M-EL38 vs H-EL38 |                                                       |                   |                      |                        |
| ko03010                    | Ribosome                                              | 38                | 372                  | $3.29 \times 10^{-8}$  |
| ko00195                    | Photosynthesis                                        | 15                | 77                   | $2.15 \times 10^{-7}$  |
| ko00196                    | Photosynthesis-antenna proteins                       | 7                 | 18                   | $2.93 \times 10^{-6}$  |
| ko04141                    | Protein processing in endoplasmic reticulum           | 25                | 271                  | $5.29 \times 10^{-5}$  |
| ko03060                    | Protein export                                        | 8                 | 53                   | 0.000973491            |
| ko00941                    | Flavonoid biosynthesis                                | 11                | 100                  | 0.001774116            |
| ko00190                    | Oxidative phosphorylation                             | 16                | 203                  | 0.005992736            |

|         |                          |   |    |             |
|---------|--------------------------|---|----|-------------|
| ko00942 | Anthocyanin biosynthesis | 1 | 1  | 0.039332342 |
| ko00360 | Phenylalanine metabolism | 8 | 79 | 0.011945126 |
| ko03020 | RNA polymerase           | 6 | 65 | 0.041566799 |

---

KEGG enrichment analyses of DEGs. Pathway: name of KEGG pathway. Ko: KEGG path id.

P-value: statistical significance of enrichment. The smaller the P-value, the higher the enrichment degree,  $P\text{-value} \leq 0.05$ .



Table S5. Number of genes in each WGCNA module

| Module name   | Gene number |
|---------------|-------------|
| MEblack       | 137         |
| MEblue        | 1932        |
| MEbrown       | 492         |
| MEgreen       | 162         |
| MEgreenyellow | 67          |
| MEmagenta     | 112         |
| MEpink        | 118         |
| MEpurple      | 67          |
| MEred         | 150         |
| MEtan         | 55          |
